# Supplementary material for: Environmental and Genetic (vgll3) Effects on the Prevalence of Male Maturation Phenotypes in Domesticated Atlantic Salmon
Source: MDPI journal article supplement (doi:10.3390/fishes8050275), 2023-05-22
Supplement: s1 [file s1]

**Table S1** Model results for the effect of genotype and maturation status on body size from the extended freshwater regime. Different superscript letters within a row indicate significant (GLM,  $p < 0.05$ ) group differences. \*  $p < 0.05$ ; \*\*  $p < 0.01$ ; \*\*\*  $p < 0.01$ .

| Family    | Variable  | Fixed effects     | Model             |      |            | R <sup>2</sup> |             | Group (maturity status and <i>vgII3</i> genotype) |                               |                               |                               |               |
|-----------|-----------|-------------------|-------------------|------|------------|----------------|-------------|---------------------------------------------------|-------------------------------|-------------------------------|-------------------------------|---------------|
|           |           |                   | $\chi^2$          | df   | <i>p</i>   | Marginal       | Conditional | Immature                                          | Mature                        | EE                            | EL                            |               |
| 6         | Weight    | Genotype          | 0.13              | 1    | 0.718      | 0.02           | 0.12        | 654 (546-761)                                     | 616 (538-694)                 | 637 (537-736)                 | 633 (545-721)                 |               |
|           |           | Mature            | 3.78              | 1    | 0.052      |                |             |                                                   |                               |                               |                               |               |
|           |           | Genotype × Mature | 0.23              | 1    | 0.630      |                |             |                                                   |                               |                               |                               |               |
|           | Length    | Genotype          | 0.17              | 1    | 0.683      | 0.06           | 0.18        | 38.3 (35.7-40.9)                                  | 36.6 (34.6-38.5)              | 37.7 (35.3-40.1)              | 37.1 (35.0-39.3)              |               |
|           |           | Mature            | 13.72             | 1    | <0.001 **  |                |             |                                                   |                               |                               |                               |               |
|           |           | Genotype × Mature | 3.44              | 1    | 0.064      |                |             |                                                   |                               |                               |                               |               |
|           | Condition | Genotype          | 5.98              | 1    | 0.014 *    | 0.11           | 0.64        | 1.13 (0.96-1.31) <sup>c</sup>                     | 1.19 (1.02-1.36) <sup>b</sup> | 1.27 (1.11-1.43) <sup>a</sup> | 1.26 (1.10-1.42) <sup>a</sup> |               |
|           |           | Mature            | 53.89             | 1    | <0.001 *** |                |             |                                                   |                               |                               |                               |               |
|           |           | Genotype × Mature | 7.96              | 1    | 0.005 **   |                |             |                                                   |                               |                               |                               |               |
|           | 8         | Weight            | Genotype          | 1.37 | 1          | 0.241          | 0.05        | 0.47                                              | 729 (502-955)                 | 687 (472-903)                 | 687 (464-910)                 | 729 (509-948) |
|           |           |                   | Mature            | 4.97 | 1          | 0.026 *        |             |                                                   |                               |                               |                               |               |
|           |           |                   | Genotype × Mature | 2.41 | 1          | 0.121          |             |                                                   |                               |                               |                               |               |
| Length    |           | Genotype          | 6.50              | 1    | 0.011 *    | 0.13           | 0.33        | 36.4 (31.6)                                       | 38.8 (35.3-42.3)              | 36.4 (33.3-39.6)              | 36.2 (32.5-40.0)              |               |
|           |           | Mature            | 0.01              | 1    | 0.930      |                |             |                                                   |                               |                               |                               |               |
|           |           | Genotype × Mature | 5.34              | 1    | 0.021 *    |                |             |                                                   |                               |                               |                               |               |
| Condition |           | Genotype          | 3.5               | 1    | 0.061      | 0.06           | 0.77        | 1.29 (0.99-1.69) <sup>b</sup>                     | 1.25 (0.96-1.62) <sup>b</sup> | 1.33 (1.03-1.72) <sup>a</sup> | 1.34 (1.03-1.74) <sup>a</sup> |               |
|           |           | Mature            | 2.4               | 1    | 0.125      |                |             |                                                   |                               |                               |                               |               |
|           |           | Genotype × Mature | 3.8               | 1    | 0.051      |                |             |                                                   |                               |                               |                               |               |

**Table S2** Model results (GLM) for the effect of genotype and maturation status on body size in family 2 from the sea transfer regime. \*  $p < 0.05$ ; \*\*  $p < 0.01$ ; \*\*\*  $p < 0.01$ .

| Year | Variable  | Fixed effects     | Model    |    |            | $R^2$ | Group (maturity status and <i>vgll3</i> genotype) |                     |                     |                     |
|------|-----------|-------------------|----------|----|------------|-------|---------------------------------------------------|---------------------|---------------------|---------------------|
|      |           |                   | $\chi^2$ | df | $p$        |       | Immature                                          | Mature              | EE                  | EL                  |
| 2017 | Weight    | Genotype          | 2.64     | 1  | 0.104      | 0.03  |                                                   |                     | 164 (158-170)       | 156 (150-163)       |
|      | Length    | Genotype          | 1.95     | 1  | 0.163      | 0.02  |                                                   |                     | 23.7 (23.4-24.0)    | 23.4 (23.1-23.7)    |
|      | Condition | Genotype          | 0.18     | 1  | 0.675      | <0.01 |                                                   |                     | 1.22 (1.21-1.24)    | 1.22 (1.20-1.23)    |
| 2018 | Weight    | Genotype          | 4.46     | 1  | 0.035 *    | 0.06  |                                                   |                     | 1224 (1180-1268)    | 1157 (1113-1202)    |
|      | Length    | Genotype          | 4.74     | 1  | 0.029 *    | 0.06  |                                                   |                     | 46.4 (45.7-47.0)    | 45.4 (44.8-46.0)    |
|      | Condition | Genotype          | 0.20     | 1  | 0.655      | <0.01 |                                                   |                     | 1.23 (1.21-1.24)    | 1.23 (1.22-1.25)    |
| 2019 | Weight    | Genotype          | 0.00     | 1  | 0.957      | 0.23  |                                                   |                     | 7515 (7250-7781)    | 7673 (7247-8100)    |
|      |           | Mature            | 19.16    | 1  | <0.001 *** |       | 8030 (7815-8245)                                  | 7158 (6704-7612)    |                     |                     |
|      |           | Genotype × Mature | 1.12     | 1  | 0.290      |       |                                                   |                     |                     |                     |
|      | Length    | Genotype          | 0.68     | 1  | 0.410      | 0.23  |                                                   |                     | 81.5 (80.4-82.6)    | 81.4 (79.7-83.2)    |
|      |           | Mature            | 21.85    | 1  | <0.001 *** |       | 83.4 (82.5-84.3)                                  | 79.5 (77.6-81.4)    |                     |                     |
|      |           | Genotype × Mature | 0.96     | 1  | 0.327      |       |                                                   |                     |                     |                     |
|      | Condition | Genotype          | 2.81     | 1  | 0.094      | 0.05  |                                                   |                     | 1.38 (1.36-1.41)    | 1.42 (1.37-1.47)    |
|      |           | Mature            | 2.50     | 1  | 0.114      |       | 1.38 (1.36-1.41)                                  | 1.42 (1.37-1.47)    |                     |                     |
|      |           | Genotype × Mature | 0.00     | 1  | 0.973      |       |                                                   |                     |                     |                     |
| 2020 | Weight    | Genotype          | 0.00     | 1  | 0.997      | 0.17  |                                                   |                     | 14899 (13523-16276) | 14897 (13787-16007) |
|      |           | Mature            | 11.49    | 1  | 0.001 ***  |       | 16678 (14667-18690)                               | 13118 (12447-13789) |                     |                     |
|      | Length    | Genotype          | 0.01     | 1  | 0.936      | 0.09  |                                                   |                     | 107 (104-110)       | 107 (105-109)       |
|      |           | Mature            | 5.41     | 1  | 0.020 *    |       | 110 (105-114)                                     | 105 (103-106)       |                     |                     |
|      | Condition | Genotype          | 0.34     | 1  | 0.562      | 0.08  |                                                   |                     | 1.18 (1.11-1.26)    | 1.20 (1.14-1.26)    |
|      |           | Mature            | 4.16     | 1  | 0.041 *    |       | 1.25 (1.14-1.36)                                  | 1.14 (1.10-1.17)    |                     |                     |

**Table S3** Model results (GLM) for the effect of genotype and maturation status on body size in family 4 from the sea transfer regime. \*  $p < 0.05$ ; \*\*  $p < 0.01$ ; \*\*\*  $p < 0.01$ .

| Year | Variable  | Fixed effects     | Model    |    |            | $R^2$ | Group (maturity status and <i>vgII3</i> genotype) |                     |                     |                     |
|------|-----------|-------------------|----------|----|------------|-------|---------------------------------------------------|---------------------|---------------------|---------------------|
|      |           |                   | $\chi^2$ | df | $p$        |       | Immature                                          | Mature              | EL                  | LL                  |
| 2017 | Weight    | Genotype          | 1.05     | 1  | 0.305      | 0.01  |                                                   |                     | 170 (158-181)       | 160 (144-175)       |
|      | Length    | Genotype          | 1.88     | 1  | 0.171      |       |                                                   |                     | 23.8 (23.3-24.4)    | 23.2 (22.5-24.0)    |
|      | Condition | Genotype          | 1.49     | 1  | 0.222      |       |                                                   |                     | 1.23 (1.21-1.24)    | 1.24 (1.22-1.26)    |
| 2018 | Weight    | Genotype          | 3.24     | 1  | 0.072      | 0.09  |                                                   |                     | 1033 (951-1114)     | 944 (841-1046)      |
|      |           | Mature            | 4.45     | 1  | 0.035 *    |       | 1069 (1018-1120)                                  | 907 (761-1053)      |                     |                     |
|      | Length    | Genotype          | 5.42     | 1  | 0.020 *    | 0.11  |                                                   |                     | 44.0 (42.8-45.2)    | 42.3 (40.8-43.8)    |
|      |           | Mature            | 4.12     | 1  | 0.042 *    |       | 44.3 (43.6-45.1)                                  | 42.0 (39.9-44.2)    |                     |                     |
|      | Condition | Genotype          | 7.25     | 1  | 0.007 **   | 0.09  |                                                   |                     | 1.20 (1.18-1.22)    | 1.23 (1.20-1.26)    |
|      |           | Mature            | <0.01    | 1  | 0.999      |       | 1.21 (1.20-1.23)                                  | 1.21 (1.18-1.25)    |                     |                     |
| 2019 | Weight    | Genotype          | 6.21     | 1  | 0.013 *    | 0.09  |                                                   |                     | 7166 (6537-7795)    | 6496 (5735-7258)    |
|      |           | Mature            | 1.13     | 1  | 0.288      |       | 7166 (6898-7434)                                  | 6496 (5252-7741)    |                     |                     |
|      | Length    | Genotype          | 12.71    | 1  | <0.001 *** | 0.16  |                                                   |                     | 81.1 (78.9-83.2)    | 77.8 (75.2-80.4)    |
|      |           | Mature            | 0.47     | 1  | 0.491      |       | 80.2 (79.3-81.1)                                  | 78.7 (74.4-82.9)    |                     |                     |
|      | Condition | Genotype          | 0.00     | 1  | 0.952      | 0.01  |                                                   |                     | 1.34 (1.28-1.40)    | 1.34 (1.26-1.42)    |
|      |           | Mature            | 0.60     | 1  | 0.439      |       | 1.36 (1.34-1.39)                                  | 1.32 (1.19-1.44)    |                     |                     |
| 2020 | Weight    | Genotype          | 0.81     | 1  | 0.369      | 0.01  |                                                   |                     | 14244 (13190-15298) | 14915 (13920-15910) |
|      |           | Mature            | 0.31     | 1  | 0.577      |       | 14373 (13246-15500)                               | 14786 (13875-15698) |                     |                     |
|      |           | Genotype × Mature | 0.05     | 1  | 0.825      |       |                                                   |                     |                     |                     |
|      | Length    | Genotype          | 0.49     | 1  | 0.482      | 0.09  |                                                   |                     | 104 (102-106)       | 103 (101-105)       |
|      |           | Mature            | 2.50     | 1  | 0.114      |       | 103 (100-105)                                     | 105 (103-107)       |                     |                     |
|      |           | Genotype × Mature | 0.02     | 1  | 0.884      |       |                                                   |                     |                     |                     |
|      | Condition | Genotype          | 5.90     | 1  | 0.015 *    | 0.15  |                                                   |                     | 1.24 (1.18-1.30)    | 1.34 (1.28-1.40)    |
|      |           | Mature            | 0.15     | 1  | 0.700      |       | 1.30 (1.23-1.36)                                  | 1.28 (1.23-1.33)    |                     |                     |
|      |           | Genotype × Mature | 0.31     | 1  | 0.576      |       |                                                   |                     |                     |                     |

**Table S4** Model results (GLM) for the effect of genotype and maturation status on body size in family 6 from the sea transfer regime. \*  $p < 0.05$ ; \*\*  $p < 0.01$ ; \*\*\*  $p < 0.01$ .

| Year | Variable  | Fixed effects | Model    |    |         | $R^2$ | Group (maturity status and <i>vgll3</i> genotype) |                     |                   |                     |
|------|-----------|---------------|----------|----|---------|-------|---------------------------------------------------|---------------------|-------------------|---------------------|
|      |           |               | $\chi^2$ | df | $p$     |       | Immature                                          | Mature              | EE                | EL                  |
| 2017 | Weight    | Genotype      | 0.03     | 1  | 0.872   | <0.01 |                                                   |                     | 161 (152-170)     | 162 (52-172)        |
|      | Length    | Genotype      | 0.16     | 1  | 0.686   | <0.01 |                                                   |                     | 23.4 (22.9-23.8)  | 23.5 (23.0-24.0)    |
|      | Condition | Genotype      | 0.18     | 1  | 0.667   | <0.01 |                                                   |                     | 1.24 (1.23-1.26)  | 1.24 (1.22-1.25)    |
| 2018 | Weight    | Genotype      | 0.09     | 1  | 0.764   | <0.01 |                                                   |                     | 1140 (1081-1200)  | 1127 (1062-1192)    |
|      | Length    | Genotype      | 0.31     | 1  | 0.580   | <0.01 |                                                   |                     | 45.5 (44.7-46.3)  | 45.2 (44.3-46.1)    |
|      | Condition | Genotype      | 2.09     | 1  | 0.148   | 0.03  |                                                   |                     | 1.20 (1.18-1.21)  | 1.21 (1.20-1.23)    |
| 2019 | Weight    | Genotype      | 0.04     | 1  | 0.848   | <0.01 |                                                   |                     | 6957 (6537-7378)  | 6904 (6355-7453)    |
|      |           | Mature        | 0.42     | 1  | 0.518   |       | 7061 (6773-7348)                                  | 6801 (6051-7550)    |                   |                     |
|      | Length    | Genotype      | 0.03     | 1  | 0.853   | 0.01  |                                                   |                     | 79.4 (77.6-81.1)  | 79.1 (76.9-81.4)    |
|      |           | Mature        | 1.04     | 1  | 0.308   |       | 80.1 (78.9-81.3)                                  | 78.4 (75.3-81.5)    |                   |                     |
|      | Condition | Genotype      | 1.57     | 1  | 0.211   | 0.07  |                                                   |                     | 1.37 (1.34-1.40)  | 1.40 (1.36-1.43)    |
|      |           | Mature        | 5.12     | 1  | 0.024   |       | 1.35 (1.33-1.37)                                  | 1.42 (1.36-1.47)    |                   |                     |
| 2020 | Weight    | Genotype      | 1.88     | 1  | 0.171   | 0.03  |                                                   |                     | 11796 (103-13244) | 12693 (11418-13969) |
|      |           | Mature        | 0.27     | 1  | 0.601   |       | 11930 (9627-14234)                                | 12559 (11886-13232) |                   |                     |
|      | Length    | Genotype      | 1.26     | 1  | 0.263   | 0.10  |                                                   |                     | 98.6 (95.2-102.0) | 100.3 (97.3-103.0)  |
|      |           | Mature        | 6.32     | 1  | 0.012 * |       | 95.9 (90.5-101.0)                                 | 103.0 (101.4-105.0) |                   |                     |
|      | Condition | Genotype      | 1.19     | 1  | 0.276   | 0.13  |                                                   |                     | 1.20 (1.13-1.28)  | 1.24 (1.17-1.30)    |
|      |           | Mature        | 6.87     | 1  | 0.009   |       | 1.30 (1.18-1.42)                                  | 1.14 (1.11-1.17)    |                   |                     |

**Table S5** Model results (GLM) for the effect of genotype and maturation status on body size in family 8 from the sea transfer regime. \*  $p < 0.05$ ; \*\*  $p < 0.01$ ; \*\*\*  $p < 0.01$ .

| Year | Variable  | Fixed effects | Model    |    |            | $R^2$ | Group (maturity status and <i>vgll3</i> genotype) |                     |                     |                     |
|------|-----------|---------------|----------|----|------------|-------|---------------------------------------------------|---------------------|---------------------|---------------------|
|      |           |               | $\chi^2$ | df | $p$        |       | Immature                                          | Mature              | EL                  | LL                  |
| 2017 | Weight    | Genotype      | 0.66     | 1  | 0.417      | 0.13  |                                                   |                     | 1.20 (1.13-1.28)    | 1.24 (1.17-1.30)    |
|      | Length    | Genotype      | 0.51     | 1  | 0.476      | 0.01  |                                                   |                     | 22.9 (22.5-23.3)    | 23.1 (22.7-23.6)    |
|      | Condition | Genotype      | 0.30     | 1  | 0.581      | <0.01 |                                                   |                     | 1.24 (1.22-1.25)    | 1.23 (1.22-1.24)    |
| 2018 | Weight    | Genotype      | 0.06     | 1  | 0.810      | <0.01 |                                                   |                     | 1170 (1123-1216)    | 1162 (1112-1211)    |
|      | Length    | Genotype      | 0.05     | 1  | 0.825      | <0.01 |                                                   |                     | 45.9 (45.3-46.5)    | 45.8 (45.1-46.5)    |
|      | Condition | Genotype      | <0.01    | 1  | 0.993      | <0.01 |                                                   |                     | 1.21 (1.19-1.22)    | 1.21 (1.19-1.22)    |
| 2019 | Weight    | Genotype      | 0.79     | 1  | 0.374      | 0.01  |                                                   |                     | 8000 (7683-8316)    | 7794 (7457-8130)    |
|      | Length    | Genotype      | 0.01     | 1  | 0.919      | 0.00  |                                                   |                     | 82.8 (81.8-83.8)    | 82.9 (81.8-84.0)    |
|      | Condition | Genotype      | 6.06     | 1  | 0.014 *    | 0.07  |                                                   |                     | 1.40 (1.38-1.43)    | 1.36 (1.34-1.39)    |
| 2020 | Weight    | Genotype      | 0.32     | 1  | 0.573      | 0.21  |                                                   |                     | 15498 (14523-16474) | 15874 (15154-16594) |
|      |           | Mature        | 8.78     | 1  | 0.003 *    |       | 16759 (15670-17848)                               | 14614 (13950-15278) |                     |                     |
|      | Length    | Genotype      | 0.12     | 1  | 0.729      | 0.01  |                                                   |                     | 107 (105-109)       | 107 (106-109)       |
|      |           | Mature        | 0.09     | 1  | 0.765      |       | 107 (105-109)                                     | 107 (106-108)       |                     |                     |
|      | Condition | Genotype      | 0.27     | 1  | 0.607      | 0.29  |                                                   |                     | 1.26 (1.21-1.31)    | 1.28 (1.24-1.32)    |
|      |           | Mature        | 14.16    | 1  | <0.001 *** |       | 1.34 (1.28-1.40)                                  | 1.19 (1.16-1.23)    |                     |                     |
